# Supplementary material
Source: HighWire-hosted journal article supplement (http://ajnr-stage2.highwire.org/highwire/filestream/51989/field_highwire_adjunct_files/0/0241_table.pdf)
Supplement: 0241_table.pdf [file 0241_table.pdf]

**On-line Table: Clinical outcome by subgroup**

| Group/Measure                         | IV + Intervention | IV only       | P     | Effect Size       |
|---------------------------------------|-------------------|---------------|-------|-------------------|
| NIHSS scores <10 (No.)                | n/a               | 14            |       |                   |
| Admission NIHSS score                 |                   | 6 (5, 7)      |       |                   |
| Follow-up NIHSS score                 |                   | 0 (0, 0.75)   |       |                   |
| NIHSS score improvement               |                   | 5 (4, 6.75)   |       |                   |
| Significance of change from admission |                   | P = .00000018 |       |                   |
| ≥4 NIHSS points                       |                   | 13 (92.9%)    |       |                   |
| ≥10 NIHSS points                      |                   | 0             |       |                   |
| Favorable outcome (NIHSS scores 0–2)  |                   | 12 (85.7%)    |       |                   |
| 90-Day mortality                      |                   | 0             |       |                   |
| NIHSS scores 10–15 (No.)              | 17                | 14            |       |                   |
| Admission NIHSS score                 | 13 (12, 14)       | 12 (11, 14)   | .492  | 0.257             |
| Follow-up NIHSS score                 | 3 (1, 9)          | 10 (1, 12)    | .065  | 0.663             |
| NIHSS score improvement               | 10 (3, 12)        | 4 (0, 9)      | .056  | 0.691             |
| Significance of change from admission | P = .00015        | P = .909      |       |                   |
| ≥4 NIHSS score points                 | 12 (70.6%)        | 7 (50.0%)     | .288  | 2.40 (0.55–10.53) |
| ≥10 NIHSS score points                | 10 (58.8%)        | 3 (21.4%)     | .067  | 5.24 (1.06–25.97) |
| Favorable outcome (NIHSS scores 0–2)  | 8 (47.1%)         | 4 (28.6%)     | .461  | 2.22 (0.50–9.96)  |
| 90-Day mortality                      | 1 (5.9%)          | 3 (23.1%)     | .290  | 0.21 (0.02–2.23)  |
| NIHSS scores >15 (No.)                | 16                | 17            |       |                   |
| Admission NIHSS score                 | 19 (17, 20)       | 18 (18, 20)   | .551  | 0.182             |
| Follow-up NIHSS score                 | 13 (8, 38)        | 42 (9, 42)    | .222  | 0.439             |
| NIHSS score improvement               | 5.5 (–16.5, 12.5) | –20 (–23, 8)  | .190  | 0.469             |
| Significance of change from admission | P = .988          | P = .082      |       |                   |
| ≥4 NIHSS score points                 | 10 (62%)          | 8 (47.1%)     | .465  | 1.88 (0.47–7.53)  |
| ≥10 NIHSS score points                | 6 (37.5%)         | 4 (23.5%)     | .465  | 1.95 (0.43–8.83)  |
| Favorable outcome (NIHSS scores 0–2)  | 3 (18.8%)         | 0             | .352  | –                 |
| 90-Day mortality                      | 3 (18.8%)         | 8 (47.1%)     | .071  | 0.21 (0.04–0.99)  |
| Men (No.)                             | 11                | 9             |       |                   |
| Admission NIHSS score                 | 18 (17, 20)       | 19 (14, 19)   | .768  | 0.134             |
| Follow-up NIHSS score                 | 8 (2, 23)         | 12 (7, 42)    | .660  | 0.203             |
| NIHSS score improvement               | 10 (–3, 14)       | 7 (–22, 9)*   | .587  | 0.251             |
| Significance of change from admission | P = .384          | P = .336*     |       |                   |
| ≥4 NIHSS points                       | 7 (63.6%)         | 5 (55.6%)     | 1.000 | 1.4 (0.23–8.46)   |
| ≥10 NIHSS points                      | 6 (54.5%)         | 2 (22.2%)     | .197  | 4.2 (0.59–30.10)  |
| Favorable outcome (NIHSS scores 0–2)  | 4 (36.4%)         | 1 (11.1%)     | 0.319 | 4.57 (0.41–51.14) |
| 90-Day mortality                      | 2 (18.2%)         | 3 (33.3%)     | 0.617 | 0.44 (0.06–3.51)  |
| Women (No.)                           | 22                | 21            |       |                   |
| Admission NIHSS score                 | 14 (12, 16.75)    | 16 (14, 18)   | 0.648 | 0.140             |
| Follow-up NIHSS score                 | 9 (2, 12)         | 11 (7, 42)    | 0.043 | 0.636             |
| NIHSS score improvement               | 9 (2.25, 12)      | 3, (–22, 8)*  | 0.017 | 0.757             |
| Significance of change from admission | P = .012          | P = .095*     |       |                   |
| ≥4 NIHSS score points                 | 14 (63.4%)        | 10 (47.6%)    | 0.364 | 1.93 (0.57–6.52)  |
| ≥10 NIHSS score points                | 8 (36.4%)         | 5 (23.8%)     | 0.203 | 1.79 (0.53–6.10)  |
| Favorable outcome (NIHSS scores 0–2)  | 7 (31.8%)         | 3 (14.3%)     | 0.281 | 2.80 (0.61–12.75) |
| 90-Day mortality                      | 2 (9.1%)          | 9 (42.9%)     | 0.009 | 0.08 (0.01–0.69)  |
| ≤80 Years of age (No.)                | 28                | 21            |       |                   |
| Admission NIHSS score                 | 15 (12, 19)       | 15 (12, 18)   | 0.761 | 0.089             |
| Follow-up NIHSS score                 | 7 (2, 13.25)      | 10 (5, 42)    | 0.107 | 0.463             |
| NIHSS score improvement               | 10 (2, 12.25)     | 6 (–22, 10)*  | 0.071 | 0.519             |
| Significance of change from admission | P = .013          | P = .650*     |       |                   |
| ≥4 NIHSS points                       | 19 (67.9%)        | 13 (61.9%)    | 0.765 | 1.30 (0.40–4.25)  |
| ≥10 NIHSS points                      | 14 (50%)          | 6 (28.6%)     | 0.154 | 2.5 (0.75–8.32)   |
| Favorable outcome (NIHSS scores 0–2)  | 7 (25%)           | 4 (19.0%)     | 0.737 | 1.42 (0.35–5.66)  |
| 90-Day mortality                      | 2 (7.1%)          | 6 (28.6%)     | 0.060 | 0.32 (0.06–1.74)  |
| >80 Years of age (No.)                | 5                 | 9             |       |                   |
| Admission NIHSS score                 | 17 (16, 18)       | 18 (16, 20)   | 0.816 | 0.138             |
| Follow-up NIHSS score                 | 10 (8, 42)        | 42 (11, 42)   | 0.480 | 0.401             |
| NIHSS score improvement               | 6 (–23, 12)*      | –20 (–22, 3)* | 0.461 | 0.412             |
| Significance of change from admission | P = .710*         | P = .087*     |       |                   |
| ≥4 NIHSS points                       | 3 (60.0%)         | 2 (22.2%)     | 0.266 | 5.25 (0.49–56.80) |
| ≥10 NIHSS points                      | 2 (40.0%)         | 1 (11.1%)     | 0.506 | 5.33 (0.34–82.83) |
| Favorable outcome (NIHSS scores 0–2)  | 1 (20.0%)         | 0             | 0.357 | –                 |
| 90-Day mortality                      | 2 (40.0%)         | 6 (66.7%)     | 0.580 | 0.33 (0.03–3.20)  |

**Note:**—n/a indicates not applicable; –, XXX; IV, intravenous; NIHSS, National Institutes of Health Stroke Scale.

\* Mean worsening of NIHSS score.

† Effect size measured as Cohen D for continuous variables or odds ratio (95% CI) for categorical variables.
